# Supplementary material for: Prioritizing Potentially Druggable Mutations with dGene: An Annotation Tool for Cancer Genome Sequencing Data
Source: PubMed Central journal article supplement (PMC3694871; doi:10.1371/journal.pone.0067980), 2013-06-27
Supplement: pone.0067980.s001.pdf [file pone.0067980.s001.pdf]

**BRC77 genes with mutations in  $\geq 2$  patients  
filtered by dGene vs PharmGKB**

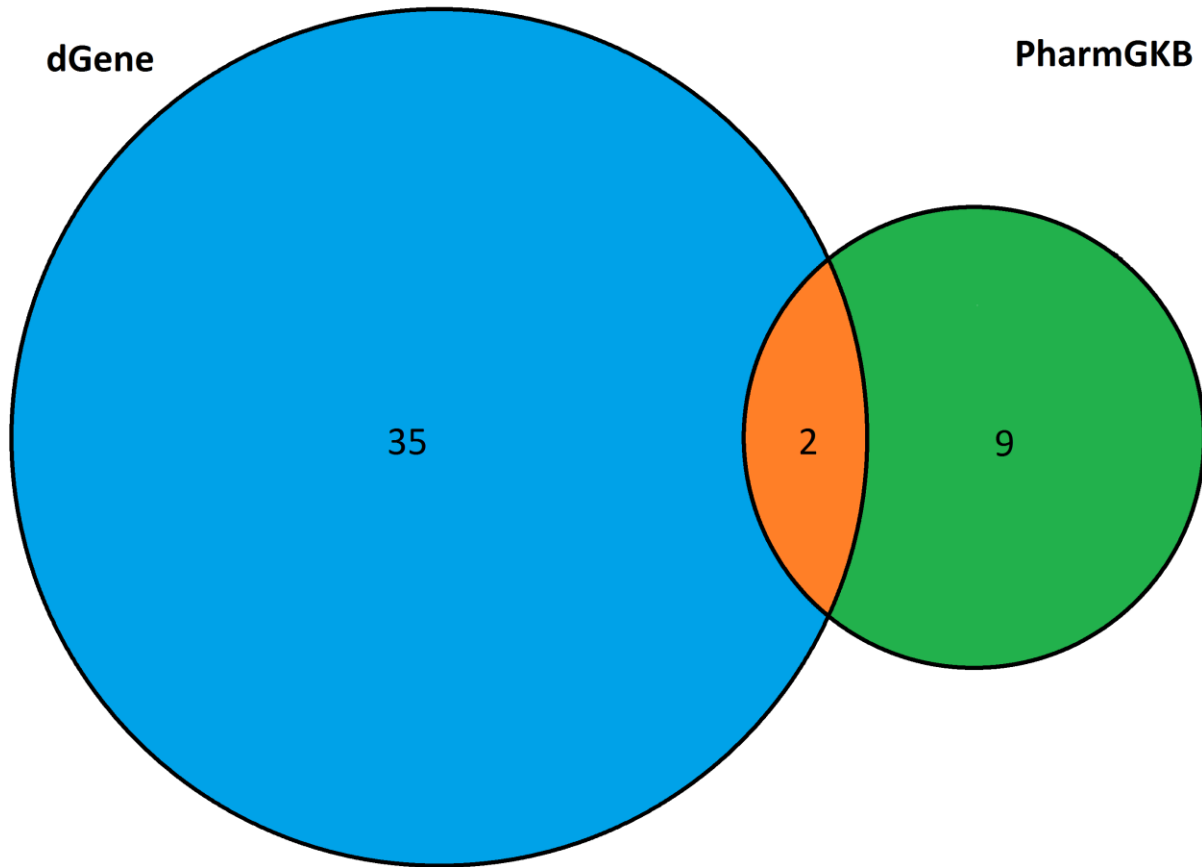

**Supplementary Figure 1.** 242 genes which were recurrently mutated in 2 or more patients in the BRC77 dataset were filtered against dGene and PharmGKB. The 37 entries found within dGene can be found in Figure 2D, while the 11 from PharmGKB are in Supplementary Table 4.
